# Supplementary material for: Water-soluble densely functionalized poly(hydroxycarbonylmethylene) binder for higher-performance hard carbon anode-based sodium-ion batteries
Source: Royal Society of Chemistry journal article supplement (doi:10.1039/d4ta00285g), 2024-01-01
Supplement: d4ta00285g1.pdf [file d4ta00285g1.pdf]

## Supporting Information

Water soluble densely functionalized  
poly(hydroxycarbonylmethylene) binder for higher performance of  
hard carbon anode-based sodium-ion batteries.

Amarshi Patra<sup>a</sup>, Noriyoshi Matsumi<sup>a\*</sup>

<sup>a</sup>Graduate School of Advanced Science and Technology, Japan Advanced Institute of  
Science and Technology, Japan

\*E-mail: matsumi@jaist.ac.jp

Tel: +81-761-51-1600

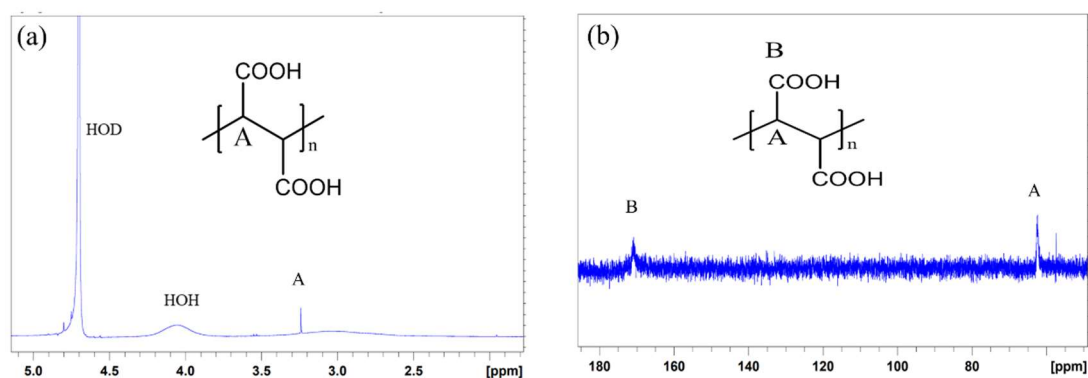

Figure S1: (a)  $^1H$  NMR and (b)  $^{13}C$  NMR of PFA.

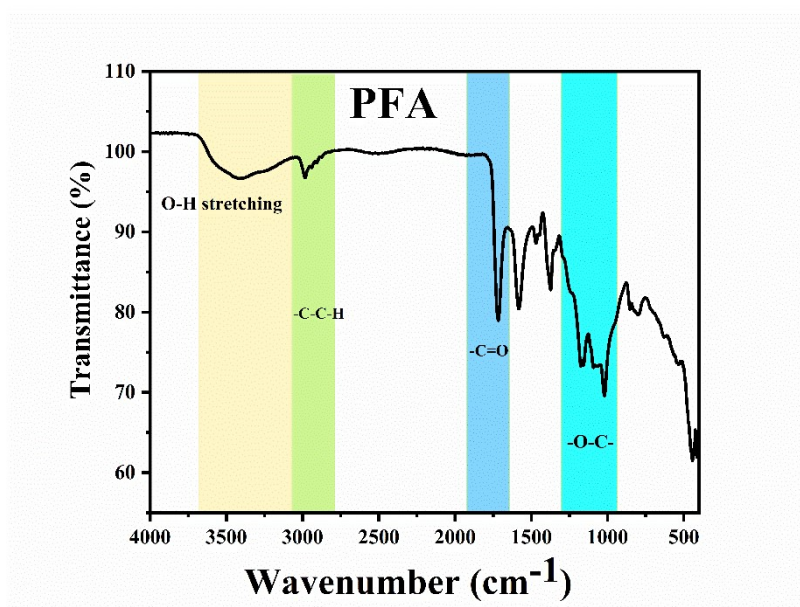

Figure S2: FT-IR profile of PFA.

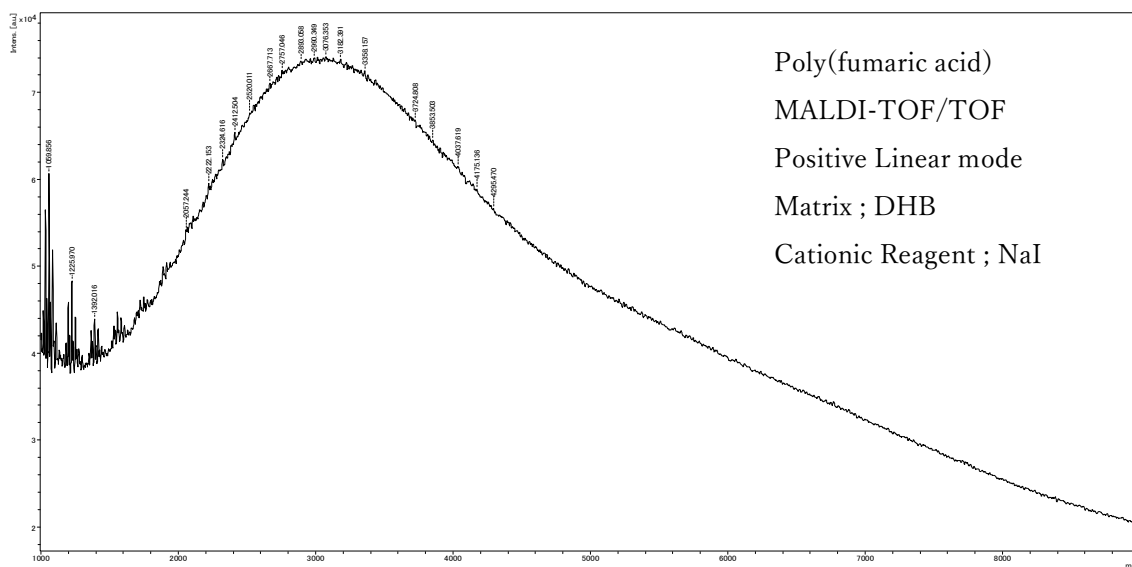

Figure S3: MALDI-TOF data of PFA.

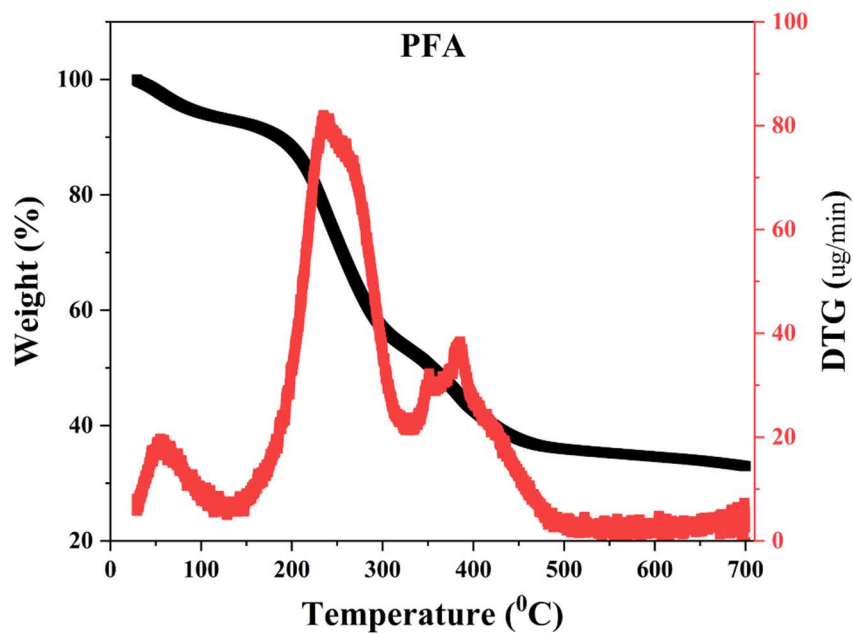

Figure S4: TGA profile of PFA.

Table S1: After CV EIS circuit fitting values of anodic half-cells

| Half cells | $R_{int}$ | $R_{SEI}$ | $R_{CT}$ | W        | $\chi^2$ | Circuit     |
|------------|-----------|-----------|----------|----------|----------|-------------|
| PFA/HC     | 1.807     | 18.1      | 673.4    | 0.008354 | 2.33E-03 | RL(QR)(QR)W |
| PAA/HC     | 1.81      | 22.39     | 4051     | 0.1843   | 6.60E-03 | RL(QR)(QR)W |
| PVDF/HC    | 2.981     | 31.67     | 2136     | 0.008169 | 1.60E-03 | RL(QR)(QR)W |

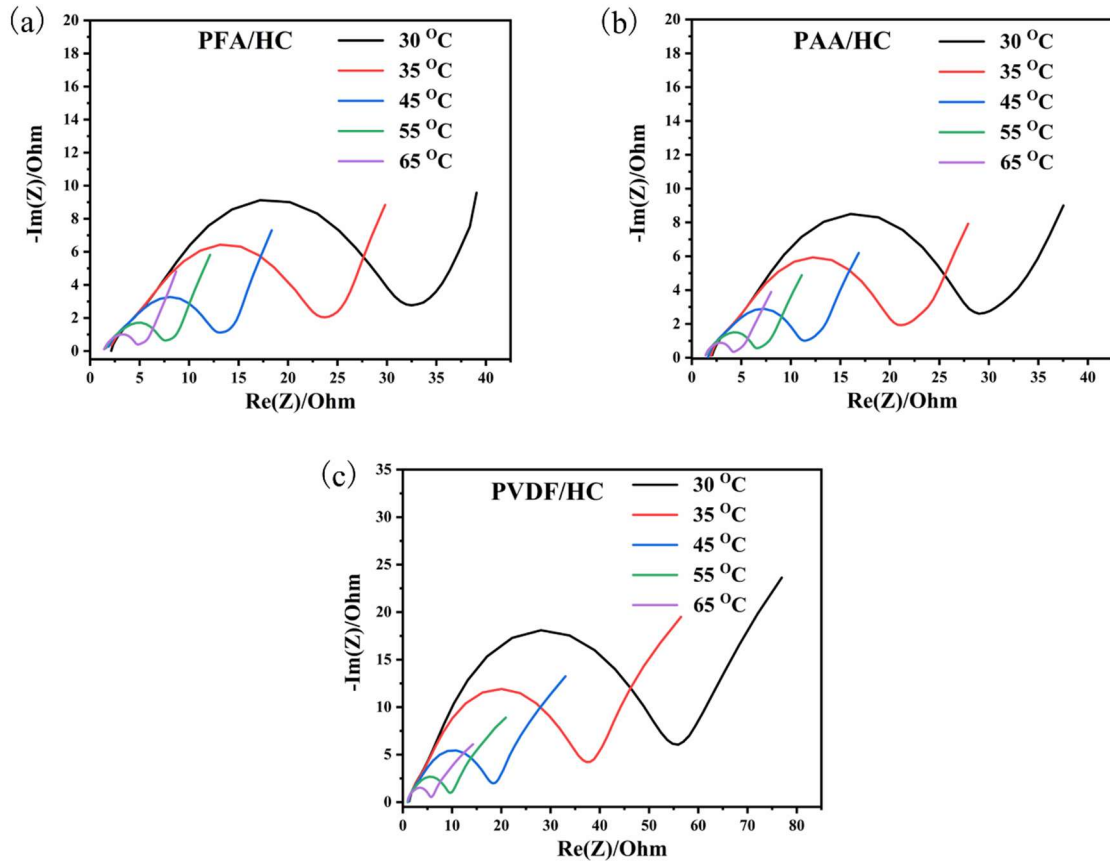

Figure S5: EIS measurement of anodic half-cells (a) PFA/HC, (b) PAA/HC and (c) PVDF/HC at different temperatures.

Table S2: EIS circuit fitting values of anodic half cells at different temperatures.

| PFA/HC |           |           |          |         |          |            |
|--------|-----------|-----------|----------|---------|----------|------------|
| Temp/K | $R_{int}$ | $R_{SEI}$ | $R_{CT}$ | W       | $\chi^2$ | Circuit    |
| 303    | 2.259     | 2.447     | 26.81    | 0.1016  | 1.59E-03 | R(QR)(QR)W |
| 308    | 2.081     | 2.225     | 18.58    | 0.1164  | 4.97E-04 | R(QR)(QR)W |
| 318    | 1.855     | 1.09      | 9.878    | 0.1447  | 6.68E-04 | R(QR)(QR)W |
| 328    | 1.63      | 0.6573    | 5.268    | 0.1757  | 9.15E-04 | R(QR)(QR)W |
| 338    | 1.39      | 0.2406    | 3.401    | 0.2143  | 1.33E-03 | R(QR)(QR)W |
|        |           |           |          |         |          |            |
| PAA/HC |           |           |          |         |          |            |
| Temp/K | $R_{int}$ | $R_{SEI}$ | $R_{CT}$ | W       | $\chi^2$ | Circuit    |
| 303    | 2.121     | 2.182     | 24.21    | 0.09809 | 9.56E-04 | R(QR)(QR)W |

|         |                  |                  |                 |         |          |            |
|---------|------------------|------------------|-----------------|---------|----------|------------|
| 308     | 1.999            | 1.627            | 17.15           | 0.1172  | 1.03E-03 | R(QR)(QR)W |
| 318     | 1.739            | 1.012            | 8.557           | 0.1533  | 1.34E-03 | R(QR)(QR)W |
| 328     | 1.519            | 0.5291           | 4.657           | 0.1937  | 6.95E-04 | R(QR)(QR)W |
| 338     | 1.33             | 0.4017           | 2.815           | 0.2471  | 7.48E-04 | R(QR)(QR)W |
|         |                  |                  |                 |         |          |            |
| PVDF/HC |                  |                  |                 |         |          |            |
| Temp/K  | R <sub>int</sub> | R <sub>SEI</sub> | R <sub>CT</sub> | W       | $\chi^2$ | Circuit    |
| 303     | 1.382            | 2.149            | 48.91           | 0.03752 | 1.86E-03 | R(QR)(QR)W |
| 308     | 1.304            | 1.81             | 32.28           | 0.04316 | 1.90E-03 | R(CR)(QR)W |
| 318     | 1.235            | 1.405            | 14.75           | 0.05982 | 2.13E-03 | R(QR)(QR)W |
| 328     | 1.057            | 1.148            | 6.98            | 0.08079 | 3.06E-03 | R(QR)(QR)W |
| 338     | 0.8974           | 0.5047           | 4.692           | 0.1745  | 1.30E-03 | R(QR)(QR)W |

Table S3: Specific capacity values at different current densities of PFA/HC, PAA/HC and PVDF/HC.

| Current density | PFA/HC | PAA/HC | PVDF/HC |
|-----------------|--------|--------|---------|
| 10 mA/g         | 332    | 316    | 208     |
| 20 mA/g         | 313    | 289    | 189     |
| 30 mA/g         | 303    | 268    | 163     |
| 60 mA/g         | 251    | 200    | 107     |
| 150 mA/g        | 132    | 111    | 68      |
| 200 mA/g        | 119    | 105    | 67      |

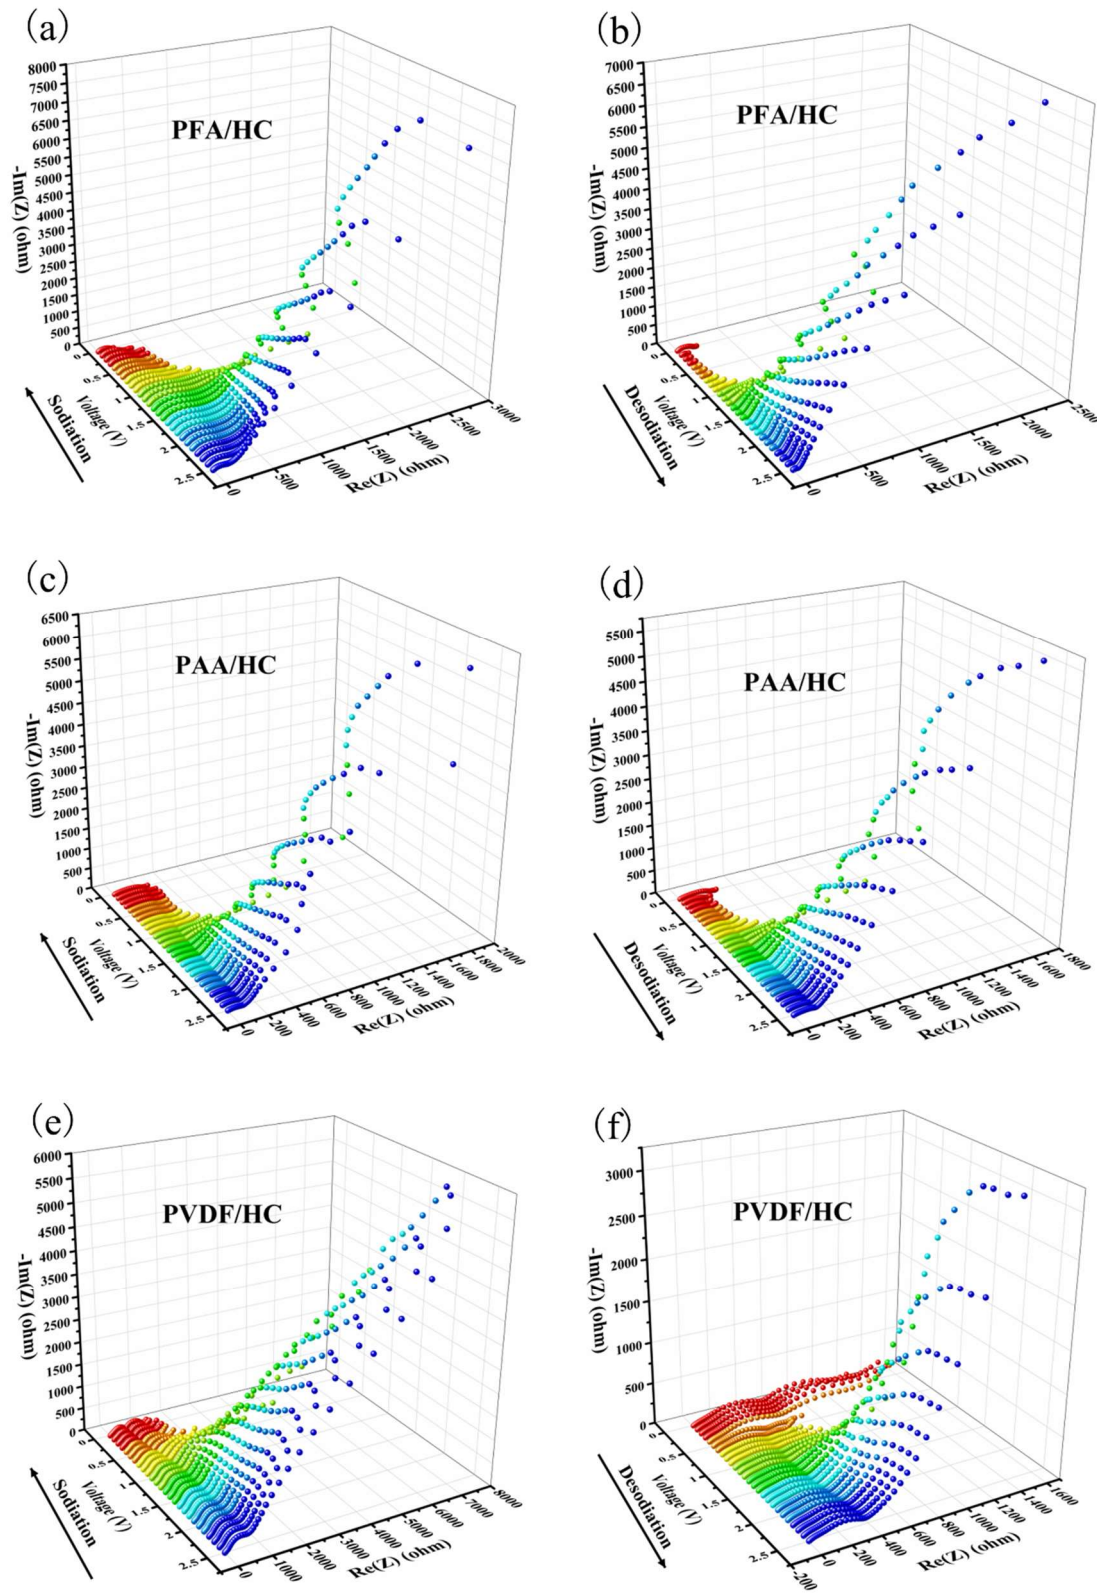

Figure S6: DEIS plot at different potential range of PFA/HC, PAA/HC and PVDF/HC during sodiation and desodiation.

Table S4: DEIS circuit fitting values of PFA/HC sodiation.

| V     | R <sub>int</sub> | R <sub>SEI</sub> | R <sub>CT</sub> | R <sub>diff</sub> | W        | $\chi^2$ | Circuit             |
|-------|------------------|------------------|-----------------|-------------------|----------|----------|---------------------|
| 0.001 | 2.365            | 1.719            | 37.62           | 124.2             | 0.5427   | 1.79E-04 | RL(QR)(QR)(QR)<br>W |
| 0.11  | 2.354            | 1.437            | 148.8           | 206.6             | 1.42E+11 | 6.88E-04 | RL(QR)(QR)(QR)<br>W |
| 0.209 | 2.372            | 1.519            | 229.9           | 234               | 9.04E+06 | 1.72E-03 | RL(QR)(QR)(QR)<br>W |
| 0.309 | 2.352            | 1.556            | 235.9           | 240.6             | 4.21E+06 | 1.31E-03 | RL(QR)(QR)(QR)<br>W |
| 0.408 | 2.35             | 1.579            | 236             | 252.5             | 3.50E+05 | 1.37E-03 | RL(QR)(QR)(QR)<br>W |
| 0.508 | 1.962            | 0.8489           | 280.2           | 1.43E+11          | 5.96E+09 | 2.81E-03 | RL(QR)(QR)(QR)<br>W |
| 0.608 | 2.385            | 1.732            | 188.3           | 251.1             | 0.074    | 7.36E-04 | RL(QR)(QR)(QR)<br>W |
| 0.807 | 2.455            | 0.9483           | 215.5           | 329.1             | 0.04566  | 1.48E-03 | RL(QR)(QR)(CR)W     |
| 0.907 | 2.449            | 1.765            | 291.2           | 372.6             | 0.04383  | 2.52E-04 | RL(QR)(QR)(QR)<br>W |
| 1.01  | 2.438            | 1.734            | 340.2           | 600.9             | 0.07672  | 1.84E-04 | RL(QR)(QR)(QR)<br>W |
| 1.11  | 2.444            | 1.574            | 384.4           | 1274              | 1.38E+19 | 2.16E-04 | RL(QR)(QR)(QR)<br>W |
| 1.21  | 2.385            | 2.605            | 419.1           | 4170              | 1.60E+06 | 4.99E-04 | RL(QR)(QR)(QR)<br>W |
| 1.3   | 2.415            | 2.309            | 421.1           | 1638              | 0.002178 | 6.61E-04 | RL(QR)(QR)(QR)<br>W |
| 1.4   | 2.409            | 2.363            | 419.1           | 1.03E+04          | 0.002334 | 8.74E-04 | RL(QR)(QR)(QR)<br>W |
| 1.5   | 2.731            | 1.663            | 415.1           | 2.61E+04          | 0.002432 | 1.20E-03 | RL(QR)(QR)(CR)W     |
| 1.6   | 2.465            | 2.32             | 399.3           | 5.10E+04          | 0.00242  | 1.18E-03 | RL(QR)(QR)(QR)<br>W |
| 1.7   | 2.411            | 2.366            | 386.3           | 5.03E+0           | 0.002424 | 1.22E-   | RL(QR)(QR)(QR)      |

|     |       |       |       |              |          |              |                     |
|-----|-------|-------|-------|--------------|----------|--------------|---------------------|
|     |       |       |       | 4            |          | 03           | W                   |
| 1.8 | 2.745 | 1.65  | 374   | 6.16E+0<br>4 | 0.002397 | 1.38E-<br>03 | RL(QR)(QR)(CR)W     |
| 1.9 | 2.42  | 2.413 | 355.3 | 7.51E+0<br>4 | 0.002343 | 1.16E-<br>03 | RL(QR)(QR)(QR)<br>W |
| 2   | 2.351 | 2.59  | 339.5 | 6.89E+0<br>4 | 0.002329 | 1.08E-<br>03 | RL(QR)(QR)(QR)<br>W |
| 2.1 | 2.756 | 1.676 | 324.8 | 6.81E+0<br>4 | 0.002333 | 1.12E-<br>03 | RL(QR)(QR)(CR)W     |
| 2.2 | 2.692 | 1.939 | 304.3 | 7.13E+0<br>4 | 0.002317 | 9.44E-<br>04 | RL(QR)(QR)(QR)<br>W |
| 2.3 | 2.697 | 1.995 | 278.8 | 6.53E+0<br>4 | 0.002332 | 8.55E-<br>04 | RL(QR)(QR)(QR)<br>W |
| 2.4 | 2.1   | 3.272 | 232.3 | 4.97E+0<br>4 | 0.002381 | 7.40E-<br>04 | RL(QR)(QR)(QR)<br>W |
| 2.5 | 2.589 | 2.376 | 143.1 | 1.85E+0<br>4 | 0.002629 | 1.23E-<br>03 | RL(QR)(QR)(QR)<br>W |

Table S5: DEIS circuit fitting values of PFA/HC desodiation.

| V     | R <sub>int</sub> | R <sub>SEI</sub> | R <sub>CT</sub> | R <sub>diff</sub> | W            | $\chi^2$     | Circuit             |
|-------|------------------|------------------|-----------------|-------------------|--------------|--------------|---------------------|
| 0.001 | 2.545            | 1.116            | 79.1            | 86.3              | 0.2147       | 3.82E-<br>04 | RL(QR)(QR)(CR)<br>W |
| 0.11  | 2.415            | 2.34             | 11.5            | 46.04             | 0.2457       | 3.90E-<br>04 | RL(QR)(QR)(QR)<br>W |
| 0.209 | 1.695            | 10.27            | 26.29           | 62.31             | 1.29E+0<br>8 | 6.02E-<br>04 | RL(QR)(QR)(QR)<br>W |
| 0.309 | 1.575            | 9.4              | 29.65           | 132               | 3.11E+0<br>7 | 3.40E-<br>04 | RL(QR)(QR)(QR)<br>W |
| 0.408 | 1.394            | 9.128            | 142.7           | 35.67             | 2.22E+0<br>7 | 3.50E-<br>04 | RL(QR)(QR)(QR)<br>W |
| 0.508 | 1.156            | 9.011            | 12.47           | 47.45             | 4.16E+0<br>6 | 4.59E-<br>04 | RL(QR)(QR)(QR)<br>W |
| 0.608 | 2.435            | 1.804            | 18.87           | 21.1              | 0.08354      | 1.40E-<br>04 | RL(QR)(QR)(QR)<br>W |



|       |       |       |       |          |          |          |                 |
|-------|-------|-------|-------|----------|----------|----------|-----------------|
| 0.707 | 2.594 | 1.456 | 18.59 | 23.08    | 0.06783  | 1.63E-04 | RL(QR)(QR)(QR)W |
| 0.807 | 2.557 | 1.35  | 22    | 46.23    | 0.05167  | 8.10E-05 | RL(QR)(QR)(CR)W |
| 0.907 | 2.546 | 1.342 | 22.63 | 80.81    | 0.03703  | 9.53E-05 | RL(QR)(QR)(CR)W |
| 1.01  | 2.383 | 1.966 | 22.75 | 160.9    | 0.02413  | 1.44E-04 | RL(QR)(QR)(QR)W |
| 1.11  | 2.33  | 2.165 | 23.11 | 359.7    | 0.01376  | 1.74E-04 | RL(QR)(QR)(QR)W |
| 1.21  | 2.398 | 1.768 | 27.68 | 2007     | 0.02313  | 1.01E-04 | RL(QR)(QR)(QR)W |
| 1.3   | 2.379 | 1.795 | 28.62 | 5982     | 0.0148   | 1.16E-04 | RL(QR)(QR)(QR)W |
| 1.4   | 2.361 | 1.814 | 29.33 | 1.28E+04 | 1.28E-02 | 1.71E-04 | RL(QR)(QR)(QR)W |
| 1.6   | 2.349 | 1.823 | 32.26 | 2.55E+04 | 0.01142  | 1.93E-04 | RL(QR)(QR)(QR)W |
| 1.7   | 2.33  | 1.821 | 32.23 | 3.07E+04 | 0.01124  | 1.93E-04 | RL(QR)(QR)(QR)W |
| 1.8   | 2.325 | 1.797 | 34    | 3.42E+04 | 0.01092  | 2.19E-04 | RL(QR)(QR)(QR)W |
| 1.9   | 2.342 | 1.698 | 34.78 | 3.64E+04 | 0.01053  | 2.53E-04 | RL(QR)(QR)(QR)W |
| 2     | 2.345 | 1.679 | 35.94 | 4.12E+04 | 0.01029  | 2.66E-04 | RL(QR)(QR)(QR)W |
| 2.1   | 2.354 | 1.61  | 37.12 | 3.92E+04 | 0.01021  | 2.55E-04 | RL(QR)(QR)(QR)W |
| 2.2   | 2.517 | 1.19  | 38.47 | 3.98E+04 | 0.01032  | 3.22E-04 | RL(QR)(QR)(QR)W |
| 2.3   | 2.016 | 9.975 | 37.5  | 4491     | 0.01363  | 7.82E-04 | RL(QR)(QR)(CR)W |
| 2.4   | 2.468 | 1.107 | 40.56 | 3.69E+04 | 0.001046 | 2.57E-04 | RL(QR)(QR)(CR)W |
| 2.5   | 2.348 | 1.523 | 39.56 | 3.15E+04 | 0.009525 | 3.48E-04 | RL(QR)(QR)(QR)W |

Table S6: DEIS circuit fitting values of PAA/HC sodiation.

| V     | R <sub>int</sub> | R <sub>SEI</sub> | R <sub>CT</sub> | R <sub>diff</sub> | W        | $\chi^2$ | Circuit             |
|-------|------------------|------------------|-----------------|-------------------|----------|----------|---------------------|
| 0.001 | 2.287            | 19.81            | 60.84           | 168.8             | 0.1727   | 9.90E-05 | RL(QR)(QR)(QR)<br>W |
| 0.11  | 2.047            | 50.04            | 106.2           | 172.5             | 2.148    | 1.24E-04 | RL(QR)(QR)(QR)<br>W |
| 0.209 | 2.26             | 33.6             | 43.78           | 193.4             | 0.09581  | 6.91E-05 | RL(QR)(QR)(QR)<br>W |
| 0.309 | 2.272            | 25.51            | 36.49           | 192.1             | 0.07324  | 4.88E-05 | RL(QR)(QR)(QR)<br>W |
| 0.408 | 2.269            | 20.79            | 28.38           | 193.3             | 0.06476  | 4.96E-05 | RL(QR)(QR)(QR)<br>W |
| 0.508 | 2.288            | 19.18            | 23.79           | 187               | 0.05677  | 5.38E-05 | RL(QR)(QR)(QR)<br>W |
| 0.608 | 2.285            | 18.56            | 18.71           | 191.7             | 0.05165  | 3.99E-05 | RL(QR)(QR)(QR)<br>W |
| 0.807 | 2.261            | 41.17            | 66.59           | 122.8             | 0.03645  | 6.83E-05 | RL(QR)(QR)(QR)<br>W |
| 0.907 | 2.282            | 53.38            | 65.45           | 133.4             | 0.02846  | 1.37E-04 | RL(QR)(QR)(QR)<br>W |
| 1.01  | 2.295            | 51.81            | 105.2           | 121.3             | 0.02067  | 1.05E-04 | RL(QR)(QR)(QR)<br>W |
| 1.11  | 2.337            | 46.32            | 115.1           | 218.1             | 0.01296  | 1.57E-04 | RL(QR)(QR)(QR)<br>W |
| 1.21  | 2.386            | 49.35            | 104.9           | 2365              | 9.75E+07 | 2.50E-04 | RL(QR)(QR)(QR)<br>W |
| 1.3   | 2.304            | 31.73            | 127.8           | 8415              | 6.38E+10 | 1.06E-04 | RL(QR)(QR)(QR)<br>W |
| 1.4   | 2.339            | 34.91            | 118.5           | 2.31E+04          | 0.0138   | 1.32E-04 | RL(QR)(QR)(QR)<br>W |
| 1.5   | 2.296            | 41.66            | 107.1           | 3.72E+04          | 0.009627 | 1.42E-04 | RL(QR)(QR)(QR)<br>W |
| 1.6   | 2.315            | 48.56            | 97.12           | 5.15E+04          | 0.008618 | 1.51E-04 | RL(QR)(QR)(QR)<br>W |
| 1.7   | 2.329            | 54.56            | 87.99           | 6.25E+0           | 0.007831 | 1.40E-   | RL(QR)(QR)(QR)      |

|     |       |       |       |              |              |              |                     |
|-----|-------|-------|-------|--------------|--------------|--------------|---------------------|
|     |       |       |       | 4            |              | 04           | W                   |
| 1.8 | 2.213 | 49.12 | 159.5 | 1.01E+0<br>5 | 4.07E+0<br>6 | 1.45E-<br>04 | RL(QR)(QR)(QR)<br>W |
| 1.9 | 2.315 | 54.99 | 80.95 | 8.07E+0<br>4 | 0.007148     | 1.33E-<br>04 | RL(QR)(QR)(QR)<br>W |
| 2   | 2.298 | 65.54 | 66.48 | 8.14E+0<br>4 | 0.006817     | 1.23E-<br>04 | RL(QR)(QR)(QR)<br>W |
| 2.1 | 2.287 | 58.21 | 70.28 | 8.04E+0<br>4 | 0.006509     | 1.10E-<br>04 | RL(QR)(QR)(QR)<br>W |
| 2.2 | 2.223 | 63.02 | 145.7 | 1.36E+0<br>5 | 5.56E+0<br>6 | 1.31E-<br>04 | RL(QR)(QR)(QR)<br>W |
| 2.3 | 2.446 | 32.61 | 88.68 | 6.04E+0<br>4 | 0.005608     | 7.54E-<br>05 | RL(QR)(QR)(QR)<br>W |
| 2.4 | 2.359 | 57.98 | 134.1 | 6.69E+0<br>4 | 2.94E+0<br>9 | 8.10E-<br>05 | RL(QR)(QR)(QR)<br>W |
| 2.5 | 2.485 | 26.04 | 119.2 | 1.21E+0<br>5 | 2.33E+0<br>5 | 1.43E-<br>03 | RL(QR)(QR)(QR)<br>W |

Table S7: DEIS circuit fitting values of PAA/HC desodiation.

| V     | R <sub>int</sub> | R <sub>SEI</sub> | R <sub>CT</sub> | R <sub>diff</sub> | W       | $\chi^2$     | Circuit             |
|-------|------------------|------------------|-----------------|-------------------|---------|--------------|---------------------|
| 0.001 | 2.346            | 17.33            | 44.61           | 185.7             | 0.1766  | 4.58E-<br>05 | RL(QR)(QR)(QR)<br>W |
| 0.11  | 2.591            | 13.05            | 19.6            | 141.5             | 0.1573  | 5.19E-<br>05 | RL(QR)(QR)(QR)<br>W |
| 0.209 | 2.666            | 16.35            | 113             | 248               | 0.6655  | 5.24E-<br>04 | RL(QR)(QR)(QR)<br>W |
| 0.309 | 2.598            | 12.2             | 97.88           | 117.6             | 13.36   | 3.52E-<br>05 | RL(QR)(QR)(QR)<br>W |
| 0.408 | 2.618            | 7.97             | 79.62           | 124.8             | 0.0738  | 1.63E-<br>05 | RL(QR)(QR)(QR)<br>W |
| 0.508 | 2.13             | 2.555            | 96.91           | 133.1             | 0.06544 | 2.38E-<br>05 | RL(QR)(QR)(CR)<br>W |
| 0.608 | 2.56             | 6.151            | 6.408           | 126.2             | 0.057   | 2.41E-<br>05 | RL(QR)(QR)(CR)<br>W |

|       |       |       |       |          |          |          |                 |
|-------|-------|-------|-------|----------|----------|----------|-----------------|
| 0.707 | 2.114 | 10.39 | 137.4 | 0.5975   | 0.05051  | 5.77E-05 | RL(QR)(QR)(QR)W |
| 0.807 | 2.554 | 9.894 | 31.36 | 119      | 0.04118  | 2.08E-05 | RL(QR)(QR)(QR)W |
| 0.907 | 2.454 | 24.01 | 58.59 | 102.1    | 0.03157  | 2.99E-05 | RL(QR)(QR)(QR)W |
| 1.01  | 2.401 | 32.65 | 91.84 | 115.8    | 0.02219  | 6.16E-05 | RL(QR)(QR)(QR)W |
| 1.11  | 2.332 | 48.07 | 75.2  | 225      | 0.01247  | 7.80E-05 | RL(QR)(QR)(QR)W |
| 1.21  | 2.293 | 63.6  | 65.77 | 2781     | 1.34E+08 | 1.18E-04 | RL(QR)(QR)(QR)W |
| 1.3   | 2.225 | 41.35 | 87.96 | 5383     | 0.00965  | 5.94E-05 | RL(QR)(QR)(QR)W |
| 1.4   | 2.263 | 43.81 | 84.81 | 1.65E+04 | 0.008158 | 8.29E-05 | RL(QR)(QR)(QR)W |
| 1.6   | 2.25  | 37.35 | 94.3  | 2.89E+04 | 0.007061 | 7.97E-05 | RL(QR)(QR)(QR)W |
| 1.7   | 2.293 | 44.92 | 79.33 | 1.98E+04 | 5.44E-03 | 2.14E-04 | RL(QR)(QR)(CR)W |
| 1.8   | 2.255 | 38.54 | 94.24 | 3.84E+04 | 0.006341 | 1.23E-04 | RL(QR)(QR)(QR)W |
| 1.9   | 2.248 | 36.56 | 95.32 | 4.25E+04 | 0.006198 | 1.22E-04 | RL(QR)(QR)(QR)W |
| 2     | 2.243 | 36.67 | 95.54 | 4.41E+04 | 0.005946 | 1.29E-04 | RL(QR)(QR)(QR)W |
| 2.1   | 2.31  | 41.04 | 88.94 | 2.97E+04 | 0.004959 | 1.97E-04 | RL(QR)(QR)(CR)W |
| 2.2   | 2.275 | 40.11 | 90.94 | 3.11E+04 | 0.004794 | 1.96E-04 | RL(QR)(QR)(CR)W |
| 2.3   | 2.179 | 23.98 | 113.2 | 4.49E+04 | 0.005645 | 1.46E-04 | RL(QR)(QR)(CR)W |
| 2.4   | 2.276 | 40.51 | 91.79 | 2.76E+04 | 0.004534 | 2.53E-04 | RL(QR)(QR)(CR)W |
| 2.5   | 2.297 | 38.94 | 93.11 | 2.48E+04 | 0.004405 | 2.80E-04 | RL(QR)(QR)(CR)W |

Table S8: DEIS circuit fitting values of PVDF/HC sodiation.

| V     | R <sub>int</sub> | R <sub>SEI</sub> | R <sub>CT</sub> | R <sub>diff</sub> | W            | $\chi^2$ | Circuit             |
|-------|------------------|------------------|-----------------|-------------------|--------------|----------|---------------------|
| 0.001 | 2.19             | 162.7            | 321.9           | 519.8             | 2.23E-02     | 1.78E-04 | RL(QR)(QR)(QR)<br>W |
| 0.11  | 2.266            | 149.4            | 353.1           | 444.7             | 1.23E-02     | 3.40E-05 | RL(QR)(QR)(QR)<br>W |
| 0.209 | 2.294            | 142.7            | 367.3           | 421.8             | 9.65E-03     | 4.27E-05 | RL(QR)(QR)(QR)<br>W |
| 0.309 | 2.321            | 136.6            | 386.2           | 434.3             | 9.15E-03     | 3.14E-05 | RL(QR)(QR)(QR)<br>W |
| 0.408 | 2.346            | 130.7            | 398.3           | 448               | 8.29E-03     | 8.05E-05 | RL(QR)(QR)(QR)<br>W |
| 0.508 | 2.372            | 130.7            | 417.3           | 534.9             | 8.82E-03     | 7.11E-05 | RL(QR)(QR)(QR)<br>W |
| 0.608 | 2.363            | 129              | 423.3           | 673.1             | 8.73E-03     | 7.16E-05 | RL(QR)(QR)(QR)<br>W |
| 0.807 | 2.395            | 131              | 498.7           | 1052              | 6.22E-03     | 1.08E-04 | RL(QR)(QR)(QR)<br>W |
| 0.907 | 2.363            | 132.3            | 504.2           | 1428              | 5.45E-03     | 1.12E-04 | RL(QR)(QR)(QR)<br>W |
| 1.01  | 2.338            | 130.2            | 527             | 1854              | 4.80E-04     | 6.95E-05 | RL(QR)(QR)(QR)<br>W |
| 1.11  | 2.295            | 130.2            | 525.5           | 2823              | 4.60E-02     | 5.24E-05 | RL(QR)(QR)(QR)<br>W |
| 1.21  | 2.224            | 127.5            | 518.1           | 3426              | 2.43E-03     | 5.07E-05 | RL(QR)(QR)(QR)<br>W |
| 1.3   | 1.637            | 185.7            | 357.4           | 1.24E+04          | 3.35E+1<br>1 | 4.25E-04 | RL(QR)(QR)(CR)W     |
| 1.4   | 2.132            | 123.9            | 490.2           | 6972              | 1.87E-03     | 4.89E-05 | RL(QR)(QR)(QR)<br>W |
| 1.5   | 1.491            | 189.2            | 363.8           | 1.05E+04          | 1.83E-03     | 3.94E-04 | RL(QR)(QR)(CR)W     |
| 1.6   | 1.458            | 186.7            | 1.26E+04        | 362.5             | 1.71E-03     | 4.10E-04 | RL(QR)(QR)(CR)W     |
| 1.7   | 2.054            | 114.7            | 472.5           | 2831              | 7.46E-04     | 3.45E    | RL(QR)(QR)(QR)      |

|     |       |       |       |              |          |          |                     |
|-----|-------|-------|-------|--------------|----------|----------|---------------------|
|     |       |       |       |              |          | -05      | W                   |
| 1.8 | 2.045 | 114.1 | 465.5 | 2608         | 7.03E-04 | 3.22E-05 | RL(QR)(QR)(QR)<br>W |
| 1.9 | 2.045 | 110.1 | 441.6 | 956.3        | 5.67E-04 | 8.12E-05 | RL(QR)(QR)(CR)W     |
| 2   | 1.458 | 168.2 | 352.5 | 1037         | 5.41E-04 | 3.51E-04 | RL(QR)(QR)(CR)W     |
| 2.1 | 1.521 | 161   | 347.3 | 960.4        | 5.11E-04 | 3.35E-04 | RL(QR)(QR)(CR)W     |
| 2.2 | 2.015 | 113.5 | 411.3 | 1220         | 5.10E-04 | 1.48E-04 | RL(QR)(QR)(CR)W     |
| 2.3 | 2.061 | 113.4 | 423.9 | 1155         | 5.17E-04 | 1.21E-04 | RL(QR)(QR)(CR)W     |
| 2.4 | 1.521 | 166.7 | 869.7 | 361.8        | 5.34E-04 | 3.69E-04 | RL(QR)(QR)(CR)W     |
| 2.5 | 1.537 | 180.2 | 342.5 | 2.45E+0<br>4 | 5.79E-03 | 4.09E-04 | RL(QR)(QR)(CR)W     |

Table S9: DEIS circuit fitting values of PVDF/HC desodiation.

| V         | R <sub>int</sub> | R <sub>SEI</sub> | R <sub>CT</sub> | R <sub>diff</sub> | W        | $\chi^2$ | Circuit             |
|-----------|------------------|------------------|-----------------|-------------------|----------|----------|---------------------|
| 0.00<br>1 | 2.35             | 156.8            | 349.5           | 513.3             | 1.98E-02 | 3.85E-05 | RL(QR)(QR)(QR)<br>W |
| 0.11      | 2.437            | 154              | 354.4           | 609.2             | 1.95E-02 | 4.88E-05 | RL(QR)(QR)(QR)<br>W |
| 0.20<br>9 | 2.492            | 146.6            | 358.5           | 588.6             | 9.46E-04 | 5.13E-05 | RL(QR)(QR)(QR)<br>W |
| 0.30<br>9 | 2.464            | 152.4            | 324.9           | 681.3             | 9.03E-03 | 1.24E-04 | RL(QR)(QR)(QR)<br>W |
| 0.40<br>8 | 2.497            | 141.6            | 352.4           | 527.7             | 8.74E-03 | 1.96E-04 | RL(QR)(QR)(QR)<br>W |
| 0.50<br>8 | 2.448            | 139.1            | 162.5           | 235.6             | 2.79E-02 | 1.56E-04 | RL(QR)(QR)(QR)<br>W |
| 0.60<br>8 | 2.385            | 121              | 148.3           | 177.1             | 2.58E-02 | 7.17E-05 | RL(QR)(QR)(QR)<br>W |

|           |             |       |       |                  |          |              |                     |
|-----------|-------------|-------|-------|------------------|----------|--------------|---------------------|
| 0.70<br>7 | 0.0442<br>7 | 99.48 | 376.9 | 1.07(0.6609<br>) | 3.21E-02 | 7.20E<br>-04 | RL(QR)(QR)(QR)<br>W |
| 0.80<br>7 | 2.274       | 119.9 | 159.3 | 275.2            | 3.63E-02 | 1.19E<br>-04 | RL(QR)(QR)(QR)<br>W |
| 0.90<br>7 | 2.246       | 133.6 | 161.8 | 267.2            | 2.96E-02 | 8.85E<br>-05 | RL(QR)(QR)(QR)<br>W |
| 1.01      | 2.479       | 72.19 | 136.6 | 289.5            | 1.62E-02 | 4.84E<br>-04 | RL(QR)(QR)(CR)<br>W |
| 1.11      | 2.203       | 153.9 | 154   | 265.9            | 1.26E-02 | 5.20E<br>-05 | RL(QR)(QR)(QR)<br>W |
| 1.21      | 2.292       | 110.4 | 122.1 | 203.5            | 5.54E-03 | 7.29E<br>-04 | RL(QR)(QR)(CR)<br>W |
| 1.3       | 2.127       | 133.1 | 163   | 1410             | 3.52E-03 | 5.05E<br>-05 | RL(QR)(QR)(QR)<br>W |
| 1.4       | 2.152       | 141.1 | 156.6 | 1.18E+04         | 3.64E-03 | 6.90E<br>-05 | RL(QR)(QR)(QR)<br>W |
| 1.6       | 1.693       | 89.14 | 222.5 | 2.51E+04         | 3.81E-03 | 2.24E<br>-04 | RL(QR)(QR)(CR)<br>W |
| 1.7       | 2.221       | 140.5 | 169.1 | 2.77E+05         | 3.87E-03 | 2.20E<br>-04 | RL(QR)(QR)(QR)<br>W |
| 1.8       | 1.604       | 96.44 | 232.3 | 1.38E+05         | 3.79E-03 | 3.34E<br>-04 | RL(QR)(CR)(CR)<br>W |
| 1.9       | 2.235       | 134.7 | 196.5 | 6.51E+05         | 3.79E-03 | 3.26E<br>-04 | RL(QR)(QR)(QR)<br>W |
| 2         | 1.427       | 121.1 | 218.4 | 9.82E+13         | 3.72E-03 | 4.51E<br>-04 | RL(QR)(QR)(QR)<br>W |
| 2.1       | 2.418       | 120   | 228.3 | 1.71E+05         | 3.50E-03 | 4.18E<br>-04 | RL(QR)(QR)(QR)<br>W |
| 2.2       | 2.348       | 126.5 | 228.8 | 2.60E+05         | 3.36E-03 | 4.19E<br>-04 | RL(QR)(QR)(QR)<br>W |
| 2.3       | 2.405       | 125.2 | 237.2 | 4.03E+05         | 3.27E-03 | 4.30E<br>-04 | RL(QR)(QR)(QR)<br>W |
| 2.4       | 2.179       | 137.7 | 229.1 | 1.35E+05         | 3.19E-03 | 4.77E<br>-04 | RL(QR)(QR)(QR)<br>W |
| 2.5       | 2.376       | 129   | 239.5 | 8.04E+04         | 3.10E-03 | 5.67E<br>-04 | RL(QR)(QR)(QR)<br>W |

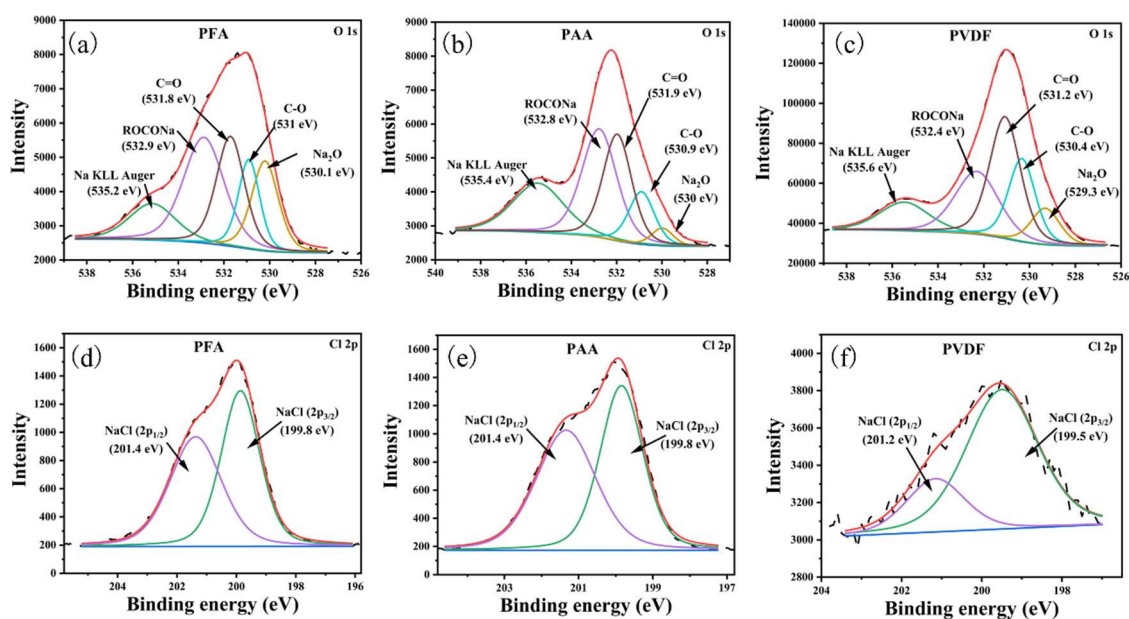

Figure S7: XPS analysis of O 1s and Cl 2p of cycled HC electrode containing different binders.

Table S10: Elemental composition percentage obtained from area under the curve of the C 1s XPS spectra.

| Elemental species               | PFA   | PAA   | PVDF  |
|---------------------------------|-------|-------|-------|
| C=C                             | 13.3% |       |       |
| C-C                             | 33.1% | 60.5% | 56.8% |
| C-O                             | 24.8% | 28.5% | 16.5% |
| C=O                             | 16.8% | 6.3%  | 9%    |
| Na <sub>2</sub> CO <sub>3</sub> | 11.7% | 4.5%  | 8.5%  |
| C-F                             |       |       | 8.9%  |

Table S11: Elemental composition percentage obtained from area under the curve of the O 1s XPS spectra.

| Elemental species | PFA   | PAA   | PVDF  |
|-------------------|-------|-------|-------|
| Na <sub>2</sub> O | 20.9% | 3.4%  | 9.3%  |
| C-O               | 18.6% | 12.2% | 20%   |
| C=O               | 22.9% | 27.5% | 33.3% |
| ROCONa            | 24.4% | 34%   | 24.5% |
| Na KLL Auger      | 13%   | 22.7% | 12.6% |



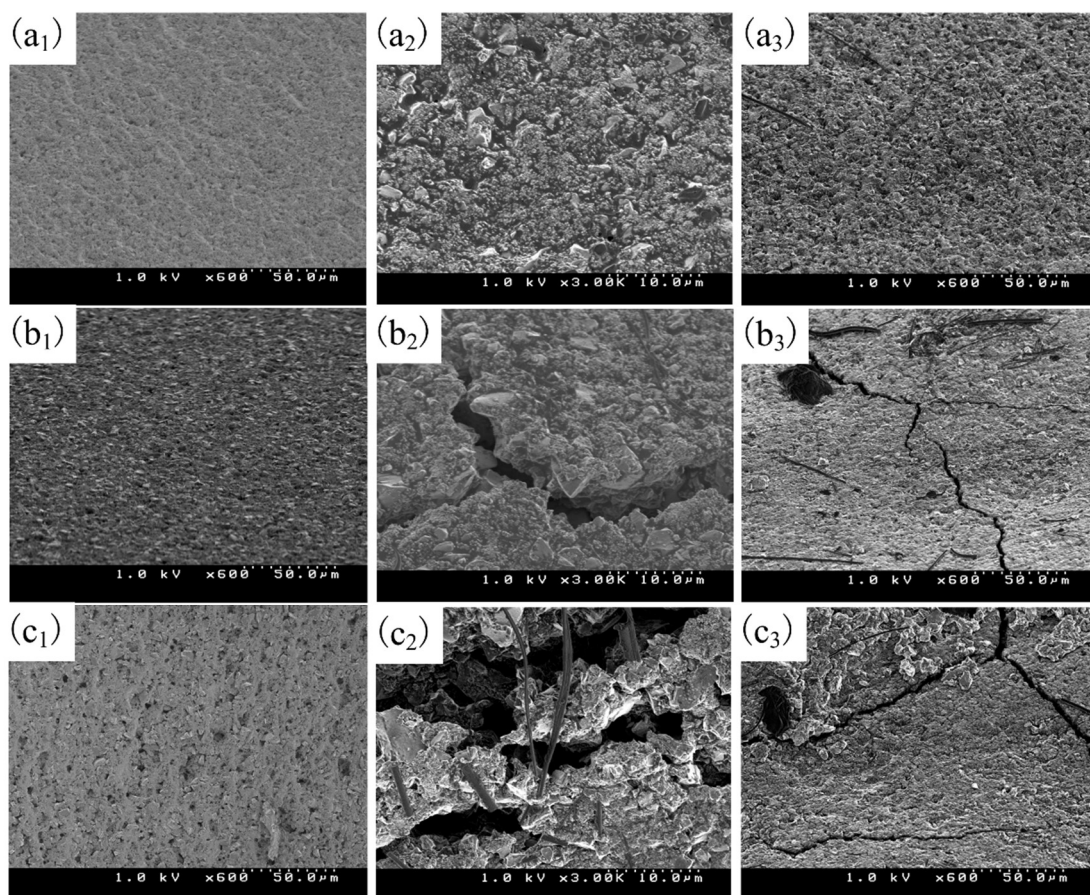

Figure S8: Top view SEM images of pristine HC electrodes with (a<sub>1</sub>) PFA, (b<sub>1</sub>) PAA and (c<sub>1</sub>) PVDF binders. Top view SEM images of cycled HC electrodes with (a<sub>2</sub>)(a<sub>3</sub>) PFA, (b<sub>2</sub>)(b<sub>3</sub>) PAA and (c<sub>2</sub>)(c<sub>3</sub>) PVDF binders at two different magnifications (10 μm and 50 μm).

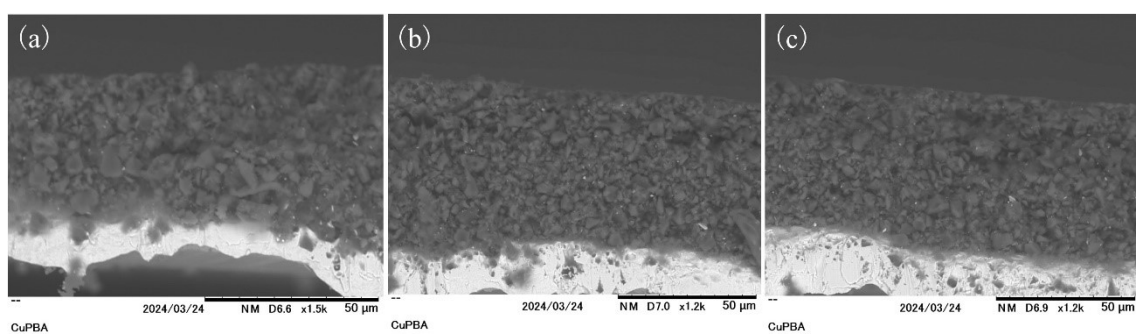

Figure S9: Cross-section view of pristine HC electrodes containing (a) PFA, (b) PAA and (c) PVDF binder.
